# Supplementary material
Source: Elsevier journal article supplement (https://www.sciencedirect.com/science/article/pii/S2341287919300420)
Supplement: mmc1 [file S2341287919300420:mmc1.docx]

**Anexo 1**

Los miembros del Grupo de Trabajo de Tiroides de la Sociedad Española de Endocrinología Pediátrica (SEEP):

Caimari Jaume, María, Hospital Universitario Son Espases Baleares. Casano Sancho, Paula Hospital Sant Joan de Déu - Barcelona. Grau Bolado, Gema, Hospital Cruces - Vizcaya. Muñoz Calvo, Mª Teresa, Hospital Infantil Niño Jesús - Madrid. Rial Rodríguez, José Manuel. Hospital Universitario Nuestra Señora de Candelaria - Santa Cruz de Tenerife. Temboury Molina, Carmen, Hospital del Sureste - Madrid
